# Supplementary material
Source: PubMed Central journal article supplement (PMC2828675)
Supplement: NIHMS173606-supplement-Suppl_Table.pdf [file NIHMS173606-supplement-Suppl_Table.pdf]

Table 1. Body weight, hemodynamic and echocardiographic measurements in WT and APN-KO mice at 7 days post-surgery.

| (n=5)       | BW<br>(g) | HR<br>(bpm) | sBP<br>(mmHg)       | LVEDD<br>(mm)          | LVESD<br>(mm)          | IVS<br>(mm)            | LVPW<br>(mm)           | FS<br>(%)              | LVPW/LVEDD             |
|-------------|-----------|-------------|---------------------|------------------------|------------------------|------------------------|------------------------|------------------------|------------------------|
| WT-sham     | 25.2±1.0  | 537±41      | 111±4               | 2.84±0.06              | 1.22±0.07              | 0.74±0.02              | 0.76±0.02              | 56.8±1.31              | 0.27±0.01              |
| WT-TAC      | 25.6±0.9  | 562±35      | 195±3 <sup>C</sup>  | 3.20±0.14 <sup>A</sup> | 1.65±0.14 <sup>A</sup> | 1.02±0.04 <sup>A</sup> | 1.06±0.02 <sup>A</sup> | 48.3±3.08 <sup>A</sup> | 0.34±0.02 <sup>A</sup> |
| APN KO-sham | 25.3±0.8  | 551±21      | 116±2               | 2.92±0.04              | 1.26±0.06              | 0.72±0.04              | 0.74±0.02              | 56.9±3.34              | 0.25±0.01              |
| APN KO-TAC  | 26.3±0.6  | 562±35      | 196±10 <sup>C</sup> | 1.80±0.11 <sup>B</sup> | 0.62±0.06 <sup>B</sup> | 1.38±0.06 <sup>B</sup> | 1.42±0.04 <sup>B</sup> | 65.2±2.07 <sup>B</sup> | 0.79±0.04 <sup>B</sup> |

<sup>A</sup>P<0.05 vs. WT-sham, <sup>B</sup>P<0.05 vs. WT-TAC, <sup>C</sup>P<0.01 vs. WT-sham. Results are presented as mean ± SEM.
